# Supplementary material
Source: Springer Nature journal article supplement (https://www.springermedizin.de/resource/supplementary/12865_2006_93_MOESM3_ESM.pdf/9428562)

# A

## Gag peptide sets

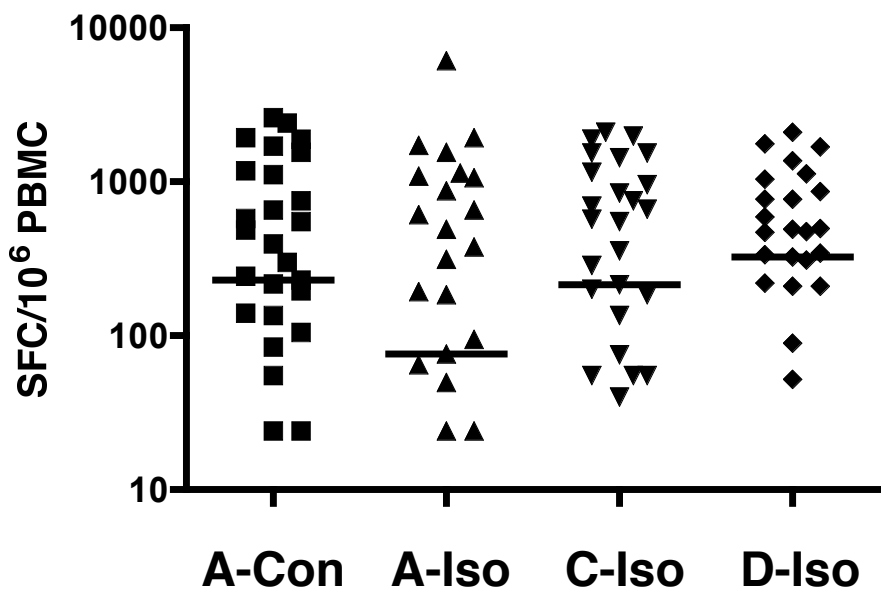

# B

## Nef peptide sets

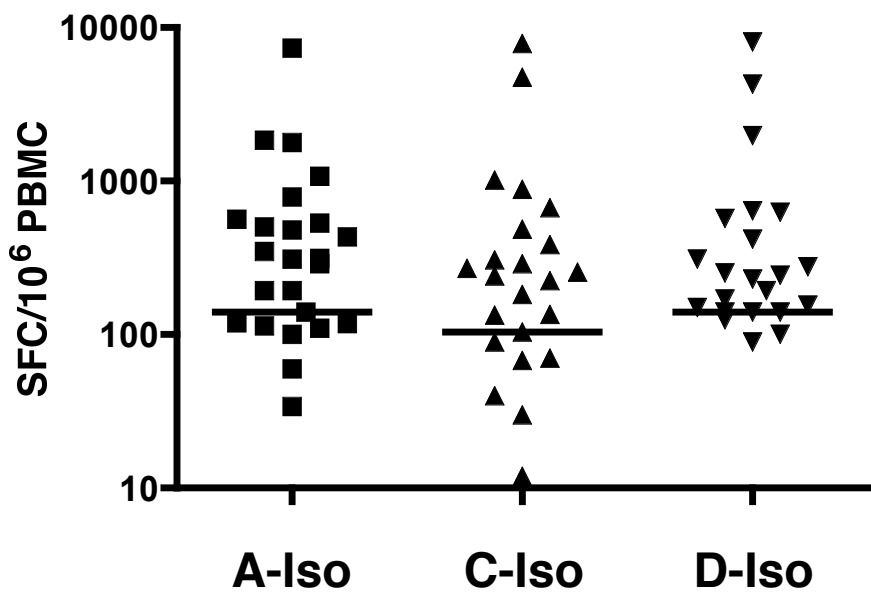

Supplement: MOESM3 [file 9428562]
